# Supplementary material for: An Observational Study on the Behavioral Impact of Maternal Breast Cancer on Children in India at a City-Based Corporate Hospital
Source: Research Square preprint supplement (doi:10.21203/rs.3.rs-7410077/v1), 2025-10-18
Supplement: Supplementary file 1 [file 612e876b317735533088a7c6.docx]

**Table-1** Child’s Perception of Mother’s illness

| **Questionnaire** | **Yes** | **No** |
| --- | --- | --- |
| You know about the mother’s health status |  |  |
| You were informed by whom about mother’s health condition | Parents | Extended Family members |
| When the child was informed | Before starting the treatment | After starting the treatment |
| My mother has long-term physical health issues. | **Yes** | **No** |
| Because of her physical condition, my mother is unable to give me her full attention. |  |  |
| I can assist my mother with minor housework. |  |  |
| You're upset about what's going on. |  |  |
| There is nothing I can do to help my mother when she becomes physically ill. |  |  |

**Table-2** Mother attitude towards their children after informing them of their diagnosis

| **Questionnaire** | **Yes** | **No** |
| --- | --- | --- |
| Told children Cancer diagnosis |  |  |
| Why told | Parents | Extended Family members |
| Why wait or not tell | - Help cope better with present situation - No Need to scare - Might damage behavioral | |
| When told | After initial diagnosis | Just After treatment start |
| Talked to children about cancer | Yes | No |
| What told. | - A disease like any disease - Will take time to recover - Believe GOD will be there and pray | |
| Explained about treatment. | Yes | No |
| What told about treatment | - Treatment will take a long time - Might lose hair - Will suffer from side effects of chemotherapy - Won’t be able to do things like before | |
